# Supplementary material for: High-throughput proteomics uncovers exercise training and type 2 diabetes–induced changes in human white adipose tissue
Source: PubMed Central journal article supplement — Sci Adv. 2023 Nov 29;9(48):eadi7548. doi: 10.1126/sciadv.adi7548 (PMC10686561; doi:10.1126/sciadv.adi7548), 2023-11-29
Supplement: sciadv.adi7548_sm.pdf [file sciadv.adi7548_sm.pdf]

Supplementary Materials for  
**High-throughput proteomics uncovers exercise training and type 2 diabetes-  
induced changes in human white adipose tissue**

Jeppe Kjærgaard Larsen *et al.*

Corresponding author: Kurt Højlund, [kurt.hoejlund@rsyd.dk](mailto:kurt.hoejlund@rsyd.dk); Atul S. Deshmukh, [atul.deshmukh@sund.ku.dk](mailto:atul.deshmukh@sund.ku.dk)

*Sci. Adv.* **9**, eadi7548 (2023)  
DOI: 10.1126/sciadv.adi7548

**The PDF file includes:**

Figs. S1 to S3  
Tables S1 and S2  
Legend for data S1

**Other Supplementary Material for this manuscript includes the following:**

Data S1

Figure S1

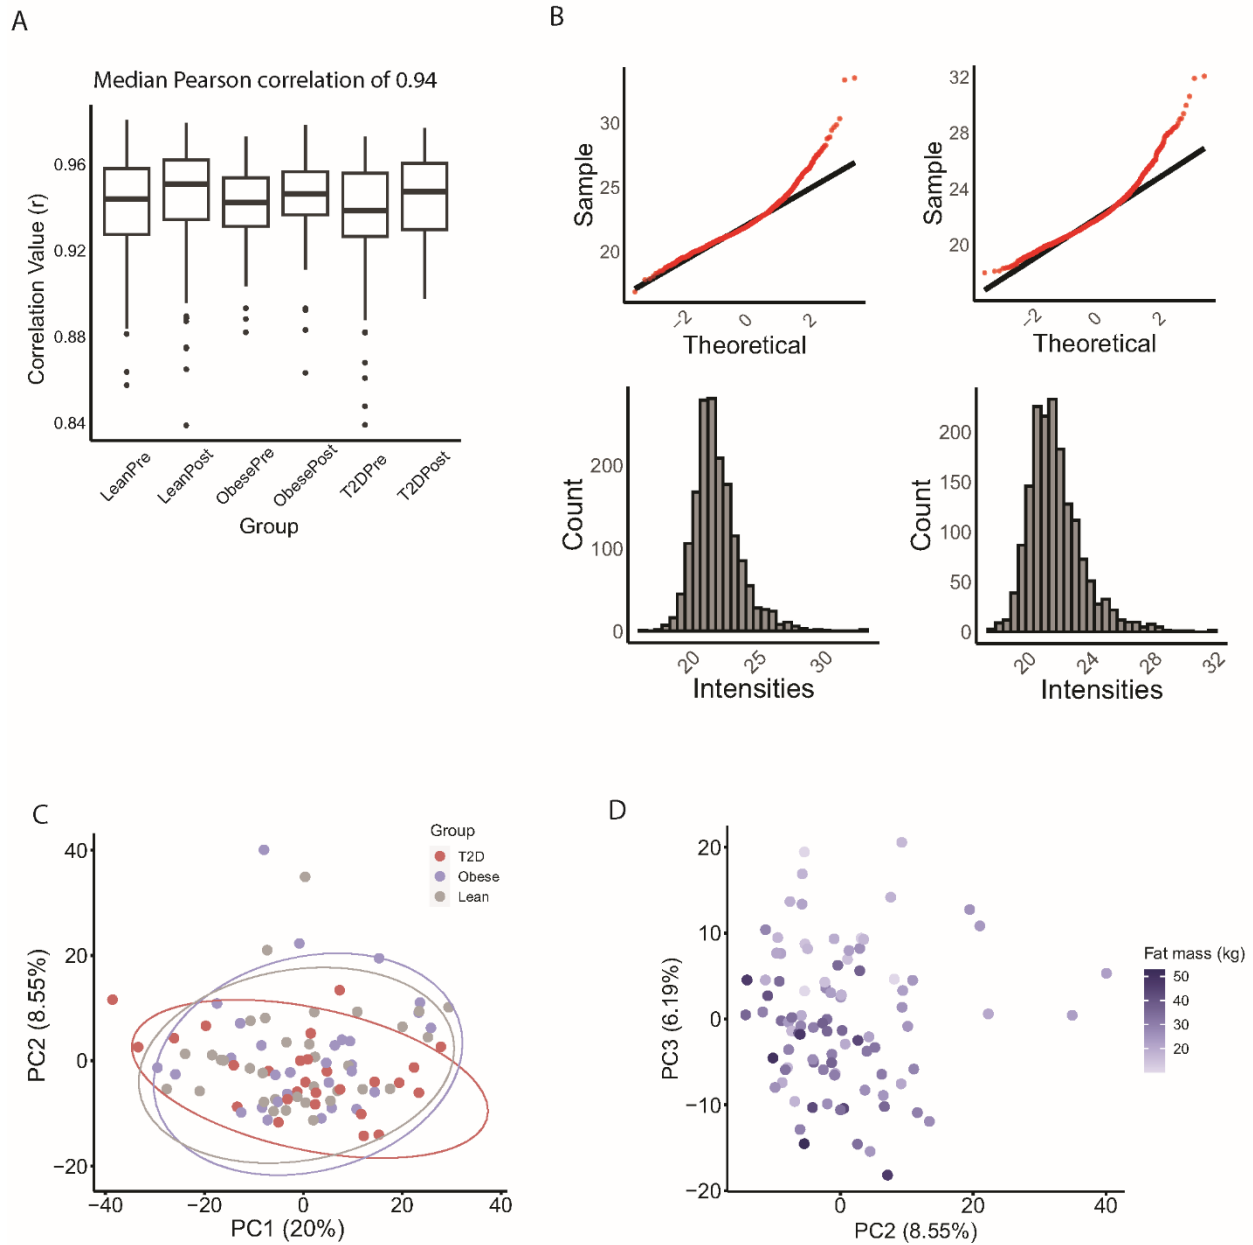

**Fig. S1.**

**High-throughput proteome analysis of human white adipose tissue.** A) Boxplot of Pearson correlation between runs within each experimental group. B) QQ-plot and histogram of protein log<sub>2</sub>-intensity distribution of two samples, C) PCA plot of component 1 (x-axis) and 2 (y-axis) colored by group. D) PCA plot of component 2 (x-axis) and 3 (y-axis) colored by fat mass (kg).

Figure S2

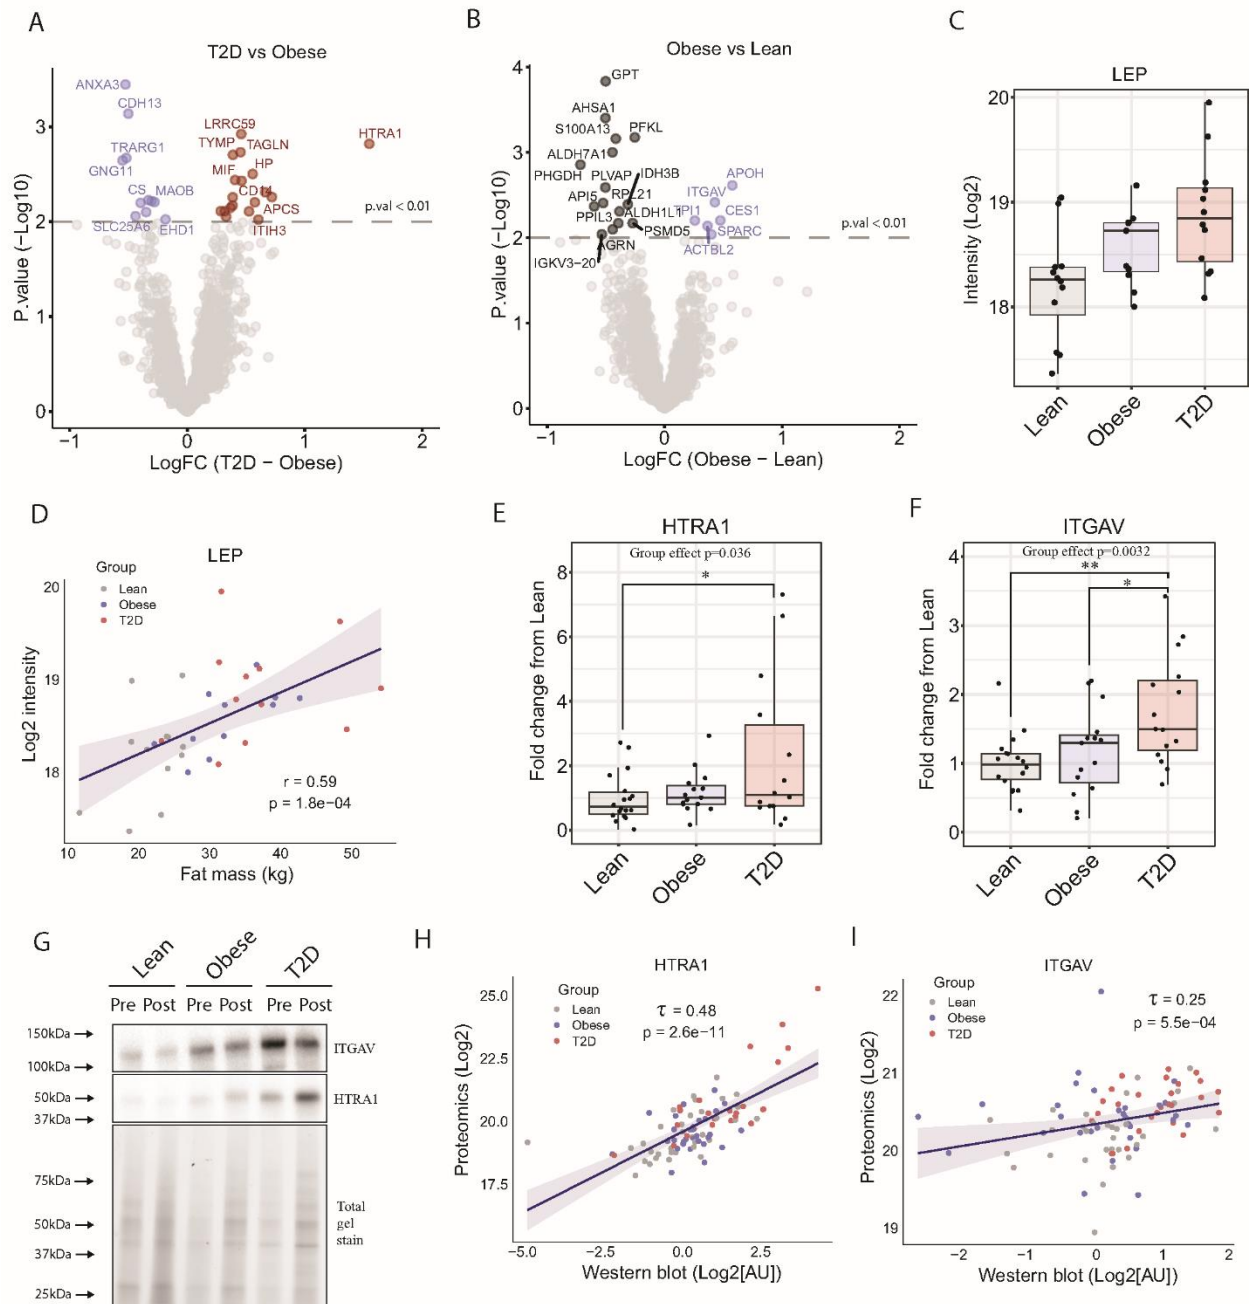

**Fig. S2.**

**Baseline proteome differences in WAT from lean obese and T2D individuals.** A-B) Volcano plot of baseline T2D-Obese and Obese-Lean comparison ( $p < 0.01$ ). C) Boxplot of baseline log2-abundance of Leptin. D) Pearson's correlation of Leptin abundance and fat mass. E-F) Boxplot of baseline HTRA1 and ITGAV abundance in scWAT measured by western blot. G) Representative western blots. H-I) Kendall's rank correlation of HTRA1 and ITGAV intensities measured by proteomics and western blot, respectively. One-way ANOVA was applied to test for group-

differences. Tukey's multiple comparisons test was used to test differences between individual groups. \* $p < 0.05$  and \*\* $p < 0.01$  versus T2D.

Figure S3

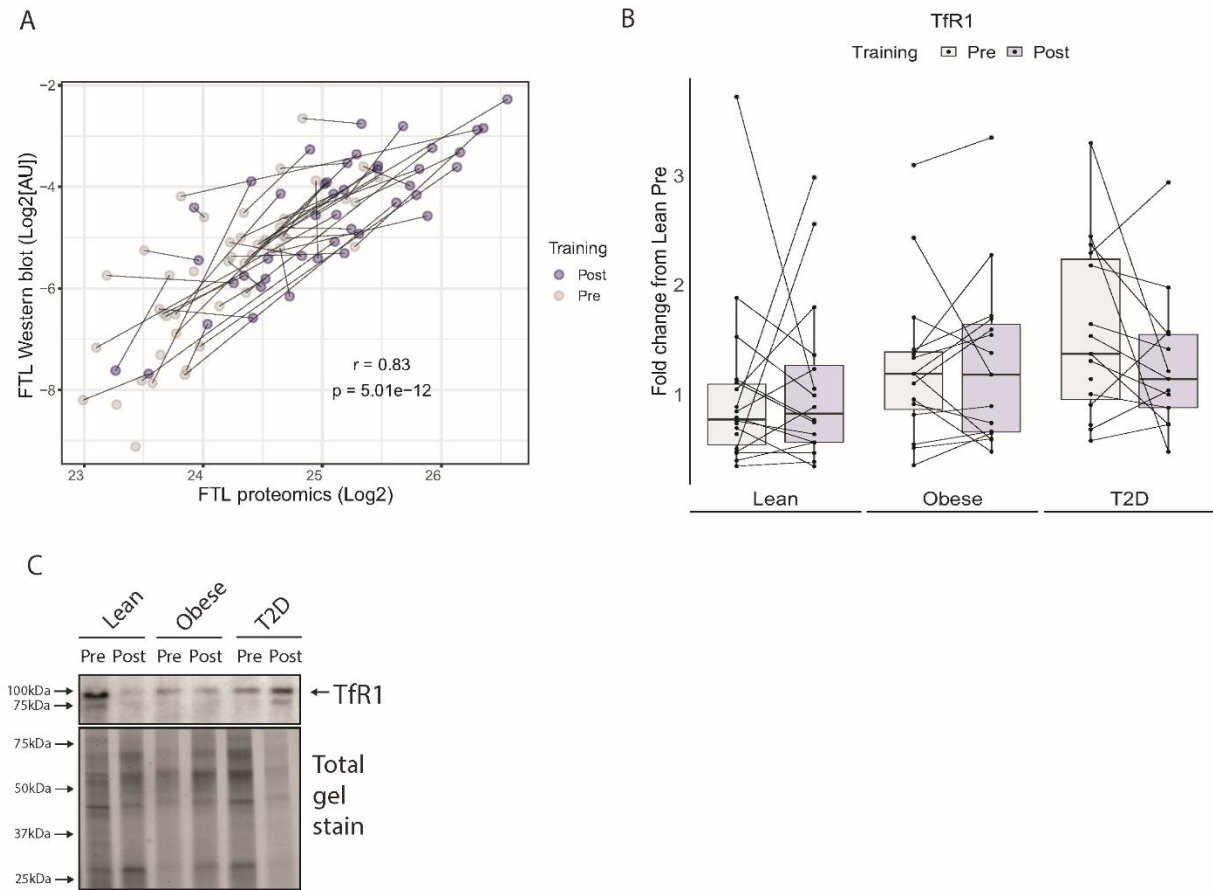

**Fig. S3.**

**Effects of exercise training on FTL and TfR1 in human scWAT.** A) Repeated measures correlation analysis of quantified FTL abundance by proteomics (x-axis) and western blot (y-axis). B) TfR1 abundance pre and post HIIT as quantified by western blot. C) Representative western blots. The upper band at ~ 100 kDa was quantified as TfR1.

**Table S1.****Clinical and metabolic characteristics, before and after 8 weeks high-intensity interval training (HIIT)**

| Characteristics                                 | Lean individuals |            | Obese individuals       |                          | T2D individuals         |                          |
|-------------------------------------------------|------------------|------------|-------------------------|--------------------------|-------------------------|--------------------------|
|                                                 | Pre              | Post       | Pre                     | Post                     | Pre                     | Post                     |
| <i>N</i>                                        | 18               | 16         | 15                      | 15                       | 15                      | 13                       |
| Age (years)                                     | 56.2±1.5         |            | 53.8±1.8                |                          | 55.2±1.7                |                          |
| Weight (kg)                                     | 78.9±2.0         | 77.3±2.2*  | 100.0±2.9 <sup>††</sup> | 98.5±2.6* <sup>††</sup>  | 103.1±3.7 <sup>††</sup> | 102.5±4.1* <sup>††</sup> |
| BMI (kg/m <sup>2</sup> )                        | 24.0±0.4         | 23.7±0.4*  | 30.8±0.7 <sup>††</sup>  | 30.3±0.6* <sup>††</sup>  | 31.2±0.8 <sup>††</sup>  | 30.8±0.9* <sup>††</sup>  |
| Waist (cm)                                      | 90±1             | 87±2**     | 106±2 <sup>††</sup>     | 102±2** <sup>††</sup>    | 109±2 <sup>††</sup>     | 106±2** <sup>††</sup>    |
| Total fat mass (kg)                             | 20.1±1.0         | 18.2±1.2** | 32.0±1.9 <sup>††</sup>  | 29.7±1.8** <sup>††</sup> | 34.8±2.3 <sup>††</sup>  | 33.0±2.5** <sup>††</sup> |
| Total lean body mass (kg)                       | 56.9±1.3         | 57.1±1.4*  | 65.3±1.3 <sup>††</sup>  | 66.2±1.2* <sup>††</sup>  | 64.8±1.7 <sup>††</sup>  | 66.8±2.0* <sup>††</sup>  |
| VO <sub>2</sub> max (ml O <sub>2</sub> /kg/min) | 38.0±1.5         | 42.8±1.7** | 33.4±1.8 <sup>†</sup>   | 36.6±1.2* <sup>†</sup>   | 25.8±0.9 <sup>†††</sup> | 30.5±1.0* <sup>†††</sup> |
| HbA1c (mmol/mol)                                | 35±1             | 34±1*      | 35±1                    | 34±1*                    | 54±4 <sup>†††</sup>     | 51±4* <sup>†††</sup>     |
| Fasting plasma glucose (mmol/l)                 | 5.2±0.1          | 5.4±0.1    | 5.6±0.1                 | 5.4±0.1*                 | 9.6±0.7 <sup>†††</sup>  | 8.8±0.7* <sup>†††</sup>  |
| Fasting serum insulin (pmol/l)                  | 61±9             | 62±12      | 71±8                    | 65±7                     | 117±19 <sup>†</sup>     | 98±15* <sup>†</sup>      |
| Plasma triglycerides (mmol/l)                   | 1.52±0.23        | 1.43±0.31  | 1.59±0.19               | 1.35±0.13                | 2.47±0.40 <sup>†</sup>  | 2.08±0.37 <sup>†</sup>   |
| GIR (mg/min/m <sup>2</sup> )                    | 325±6            | 442±33**   | 325±22                  | 439±33**                 | 189±28 <sup>†</sup>     | 300±36* <sup>††</sup>    |

Data are means±SEM. \**P*<0.05 and \*\**P*<0.001 vs. before (Pre) HIIT, <sup>†</sup>*P*<0.05 and <sup>††</sup>*P*<0.001 vs. lean, <sup>‡</sup>*P*<0.05 and <sup>‡‡</sup>*P*<0.001 vs. obese. T2D, type 2 diabetes; WHR, waist-to-hip ratio; Pre, pre-training; Post, post-training; GIR, insulin-stimulated glucose infusion rate; HIIT, high-intensity interval training. The clinical and metabolic data were reported previously (6).

**Table S2.****Key resources table**

| REAGENT or RESOURCE                            | SOURCE                        | IDENTIFIER                                                                              |
|------------------------------------------------|-------------------------------|-----------------------------------------------------------------------------------------|
| Antibodies                                     |                               |                                                                                         |
| FTL                                            | LifeTechnologies              | Cat #PA5-83567                                                                          |
| FTH1                                           | FischerScientific             | Cat #PA5-27500                                                                          |
| Transferin receptor                            | Abcam                         | Cat #Ab214039                                                                           |
| Oxphos cocktail                                | Abcam                         | Cat #Ab110411                                                                           |
| HTRA1                                          | Abcam                         | Cat #Ab274322                                                                           |
| ITGAV                                          | Invitrogen                    | Cat #MA5-32195                                                                          |
| Anti-rabbit                                    | Jackson Immuno                | Cat #111-036-045                                                                        |
| Anti-mouse                                     | Jackson Immuno                | Cat #315-036-045                                                                        |
| Biological Samples                             |                               |                                                                                         |
| Human subcutaneous fat biopsies                | This study                    | N/A                                                                                     |
| Chemicals, Peptides, and Recombinant Proteins  |                               |                                                                                         |
| 2-Chloroacetamide                              | Sigma                         | Cat# 22790                                                                              |
| SDS                                            | Sigma                         | Cat# 71736/74255                                                                        |
| Tris-HCl                                       | Roche                         | Cat# 10812846001                                                                        |
| Acetonitrile                                   | Thermo                        | Cat# A9554                                                                              |
| Trifluoroacetic acid                           | Sigma                         | Cat# 808260                                                                             |
| NH4OH                                          | Merck                         | Cat# 105428                                                                             |
| Benzonase                                      | Merck                         | Cat# 71205                                                                              |
| 4-20% Mini-Protean TGX stain-free protein gels | BioRad                        | Cat #4568096                                                                            |
| 8-16% Mini-Protean TGX stain-free protein gels | BioRad                        | Cat #4568106                                                                            |
| Bovine serum albumin                           | Merck                         | Cat #A7906                                                                              |
| Skim milk powder                               | Merck                         | Cat #70166                                                                              |
| Trisma                                         | Sigma                         | Cat #T6066                                                                              |
| NaCl                                           | Sigma                         | Cat #31434                                                                              |
| Tween20                                        | Sigma                         | Cat #P7949                                                                              |
| Glycine                                        | Sigma                         | Cat #G7126                                                                              |
| Precision plus protein all blue standard       | BioRad                        | Cat #1610393                                                                            |
| ECL luminata forte western HRP substrat        | Merck                         | Cat #WBLUF0500                                                                          |
| Super ECL                                      | Fischer Scientific            | Cat #34094                                                                              |
| Deposited Data                                 |                               |                                                                                         |
| Mass spectrometry proteomics data              | This paper                    | PRIDE: PXD040434.                                                                       |
| Software and Algorithms                        |                               |                                                                                         |
| R version v4.2.1                               | R Development Core Team, 2016 | <a href="https://www.R-projects.org/">https://www.R-projects.org/</a>                   |
| FragPipe v19.0                                 | (37)                          | <a href="https://github.com/Nesvilab/FragPipe">https://github.com/Nesvilab/FragPipe</a> |

|                              |                 |                                                                                     |
|------------------------------|-----------------|-------------------------------------------------------------------------------------|
| DIA-NN v1.8.2                | (41)            | <a href="https://github.com/vdemichev/DiaNN">https://github.com/vdemichev/DiaNN</a> |
| SigmaPlot 12.5               | Systat Software |                                                                                     |
| ImageLab 6.1                 | BioRad          |                                                                                     |
| ChemiDoc VRS+ Imaging system | BioRad          |                                                                                     |

**Captions for the supplementary Data File S1:**

- A. Overview
- B. Complete matrix of all 3773 quantified proteins
- C. Filtered matrix (2016 proteins) for differential expression (DE) analysis
- D. Overview of 48 significant proteins in T2D-Lean baseline comparison
- E. Baseline correlation of 48 significant proteins with clinical parameters
- F. Diabetes-driven GeneSet enrichment analysis of GOBP and GOCC terms
- G. Obesity-driven GeneSet enrichment analysis of GOBP and GOCC terms
- H. Overlap of HIIT-induced changes in GOCC terms in lean and obese group
- I. HIIT-induced changes in GOCC and GOBP terms in T2D group
